# Supplementary material
Source: PubMed Central journal article supplement (PMC2956940)

**S1**

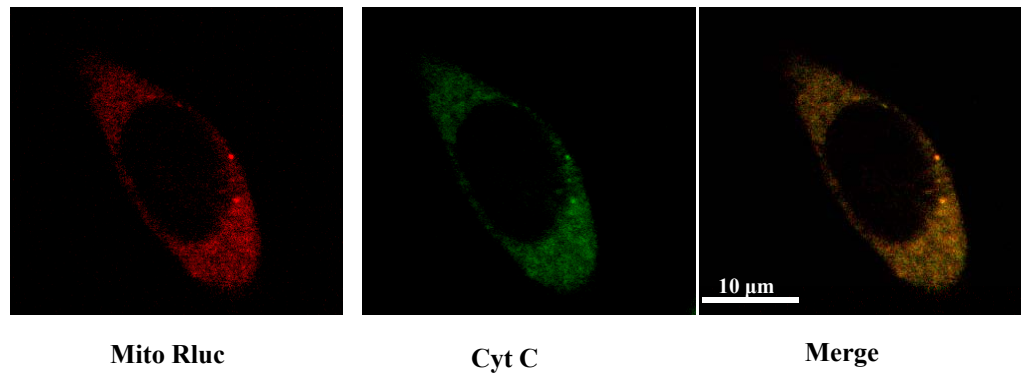

Supplement: tjp0588-2987-SD1.pdf [file tjp0588-2987-SD1.pdf]
